# Supplementary material for: Measurement report: Altitudinal variation of CCN activation acrossthe Indo-Gangetic Plains prior to monsoon onset and during peakmonsoon periods: Results from the SWAAMI field campaign
Source: Copernicus journal article supplement (doi:10.5194/acp-2020-1233), 2020-12-29
Supplement: Supplementary file 1 [file acp-2020-1233-supplement.pdf]

## Supplementary Material

### Measurement report: Altitudinal variation of CCN activation across the Indo-Gangetic Plains prior to monsoon onset and during peak monsoon periods: Results from the SWAAMI field campaign

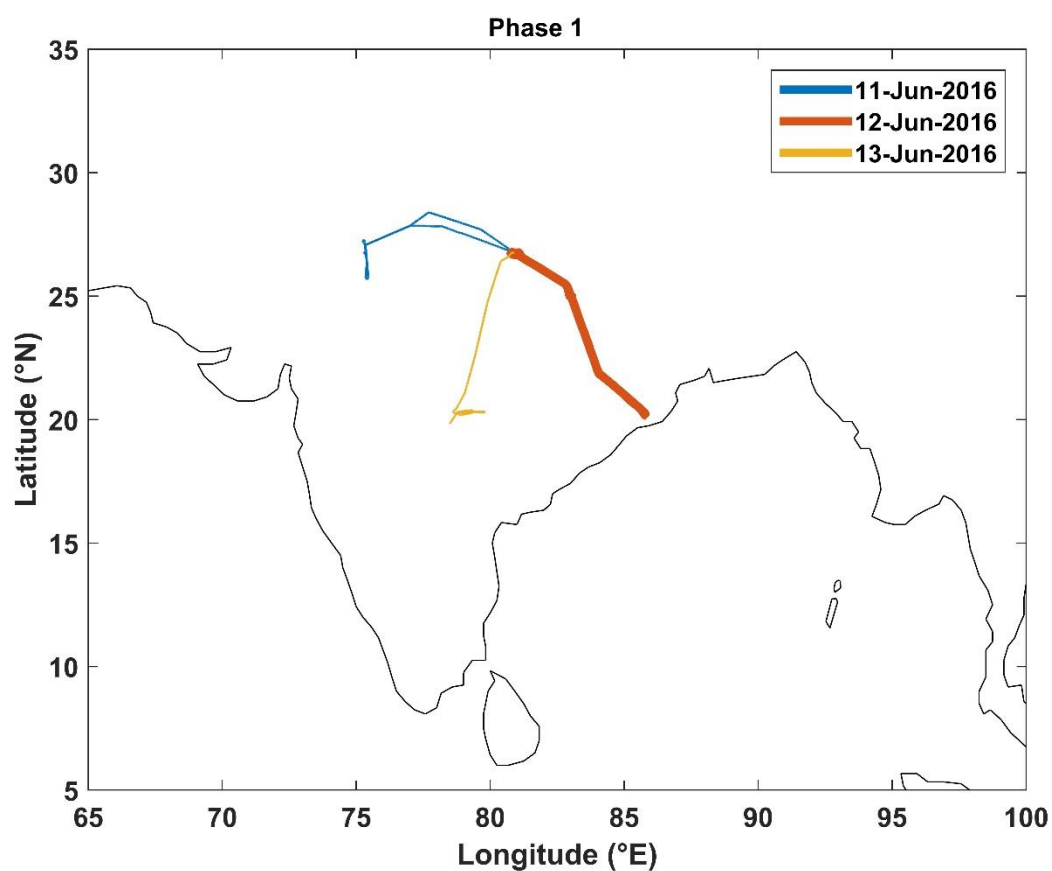

Figure S1: Flight track during phase 1 measurements

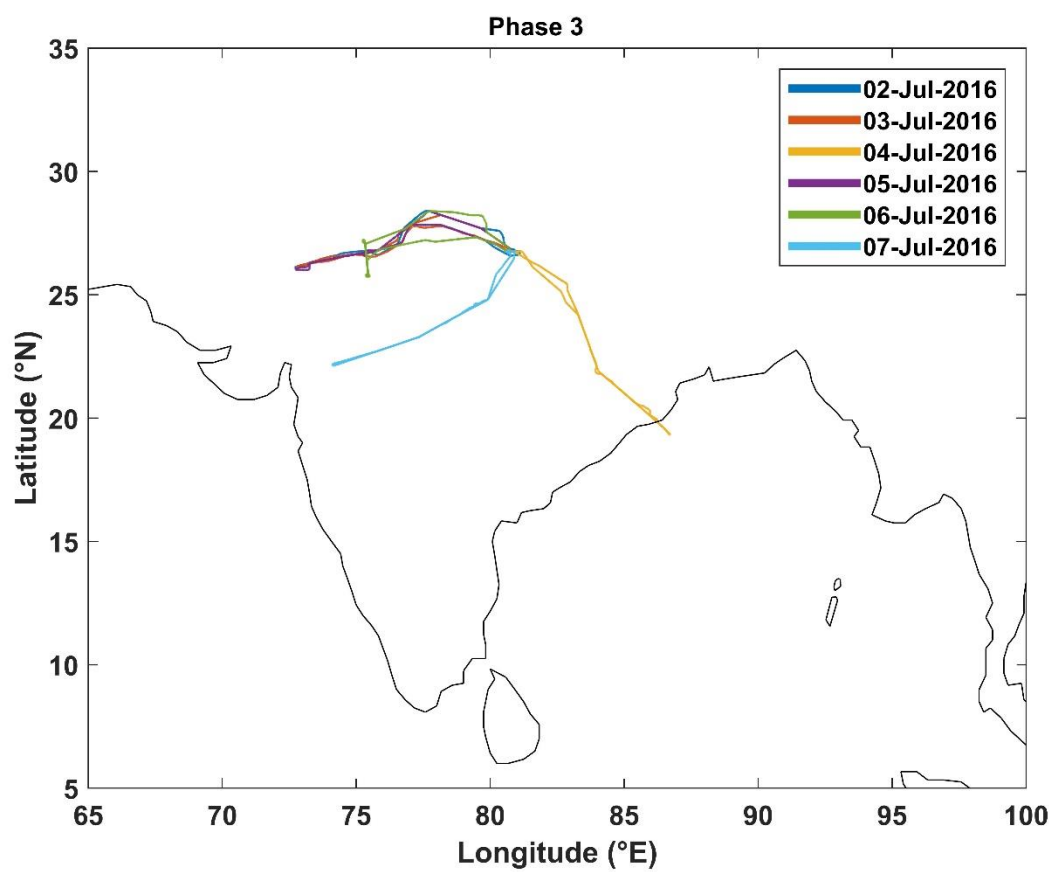

**Figure S2: Flight track during phase 3 measurements**

NOAA HYSPLIT MODEL  
Backward trajectories ending at 0700 UTC 11 Jun 16  
CDC1 Meteorological Data

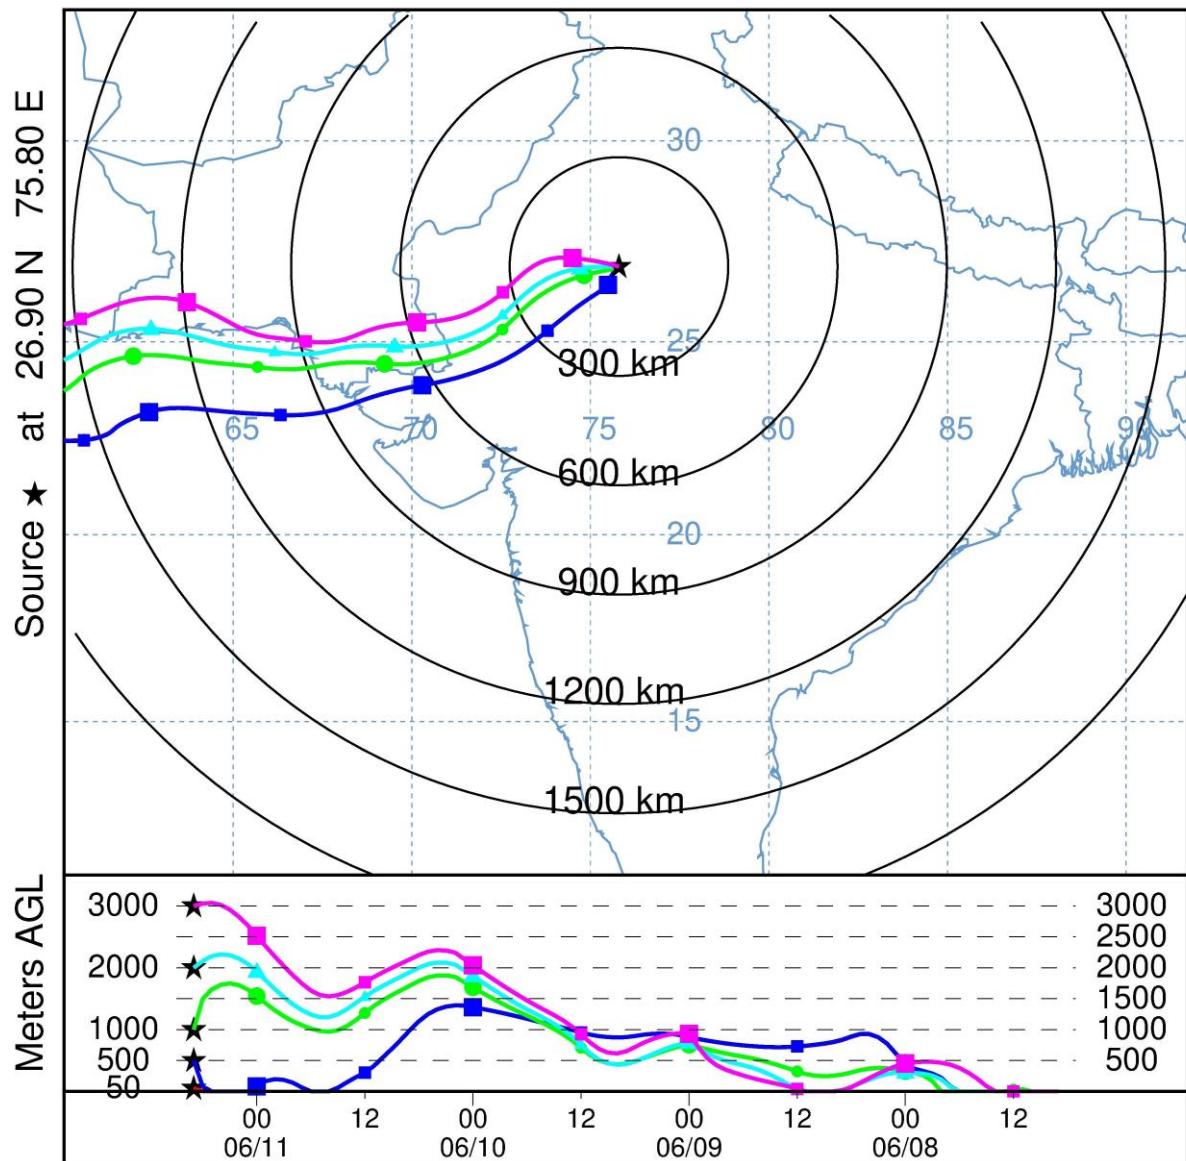

Figure S3: 96 hour back trajectory of air mass arriving at JPR on 11<sup>th</sup> June at altitudes 50 m, 500 m, 1 km, 2 km and 3 km.

NOAA HYSPLIT MODEL  
Backward trajectories ending at 0700 UTC 11 Jun 16  
CDC1 Meteorological Data

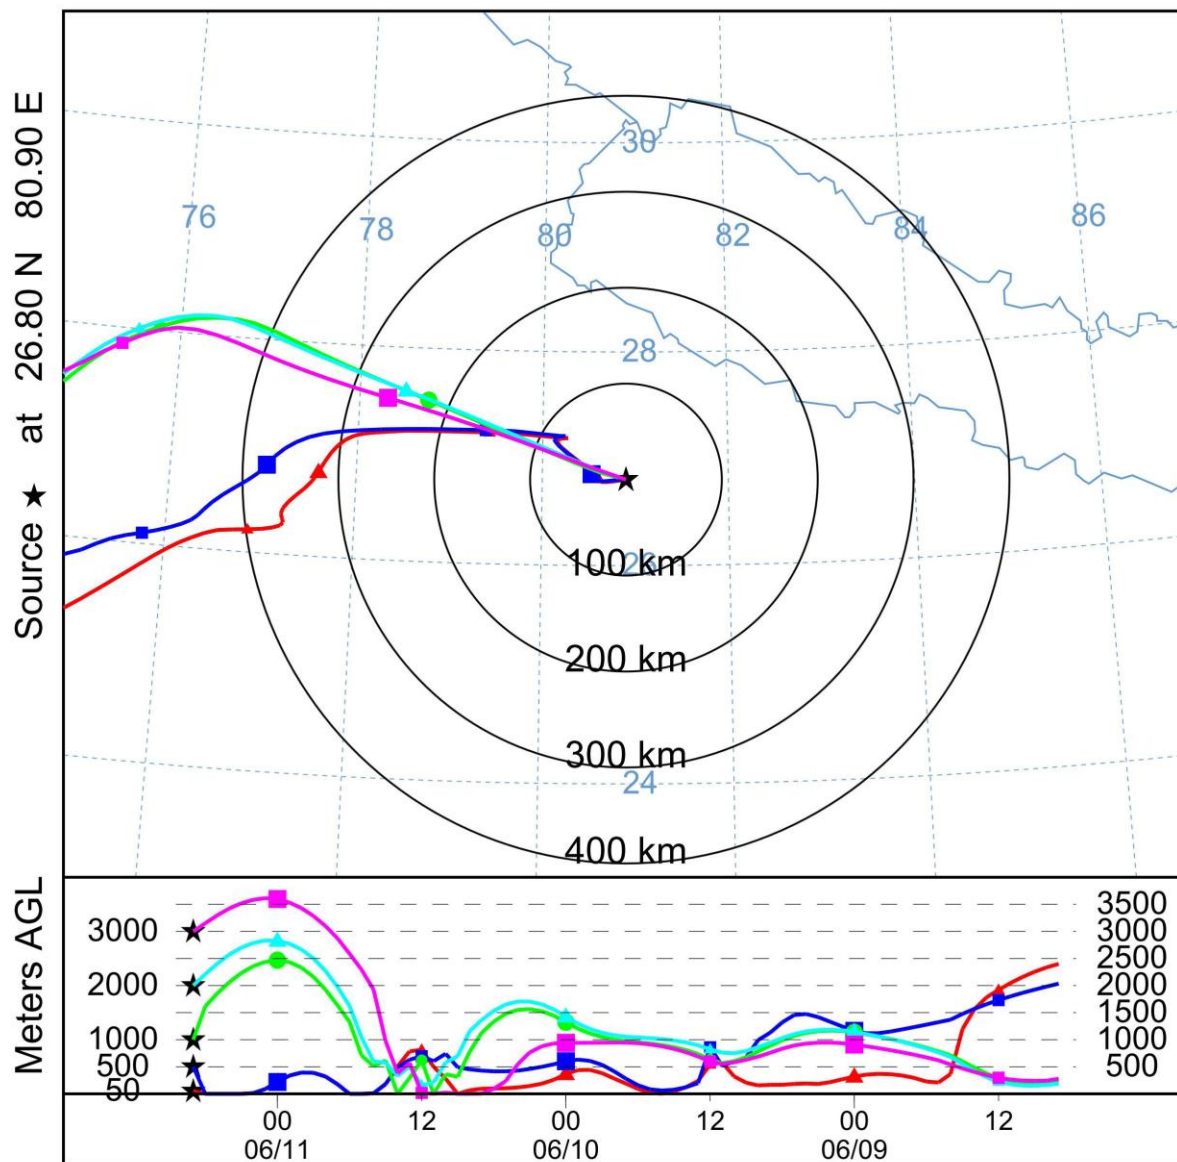

Figure S4: 72 hour back trajectory of air mass arriving at LCK on 11<sup>th</sup> June at altitudes 50 m, 500 m, 1 km, 2 km and 3 km.

NOAA HYSPLIT MODEL  
Backward trajectories ending at 0700 UTC 12 Jun 16  
CDC1 Meteorological Data

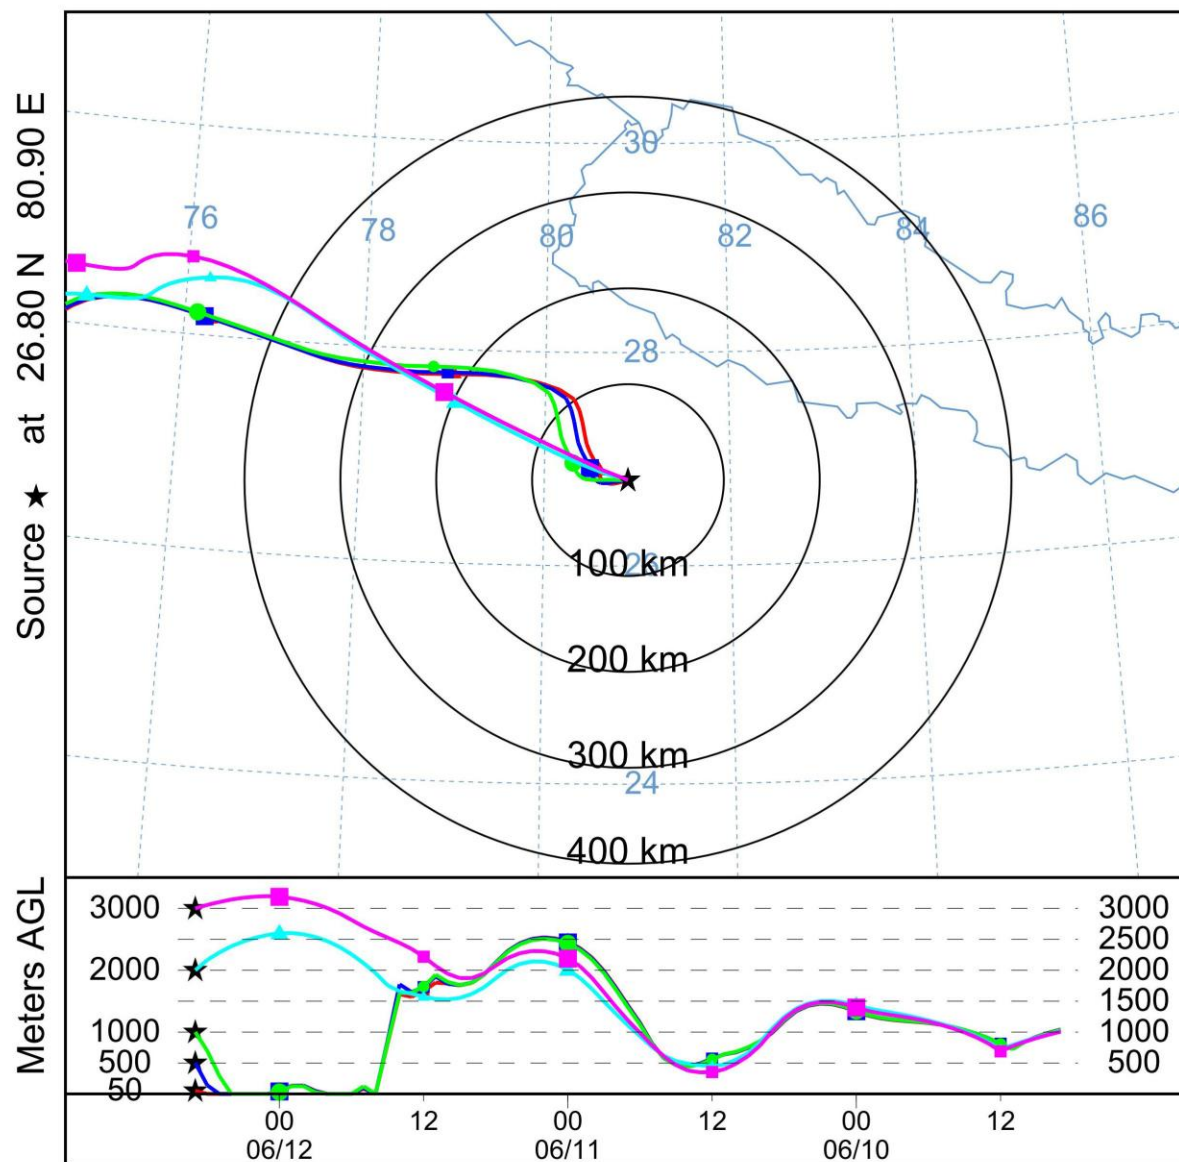



NOAA HYSPLIT MODEL  
Backward trajectories ending at 0700 UTC 11 Jun 16  
CDC1 Meteorological Data



Figure S5: 72 hour back trajectory of air mass arriving at LCK on 12<sup>th</sup> June at altitudes 50 m, 500 m, 1 km, 2 km and 3 km.

NOAA HYSPLIT MODEL  
Backward trajectories ending at 0700 UTC 13 Jun 16  
CDC1 Meteorological Data

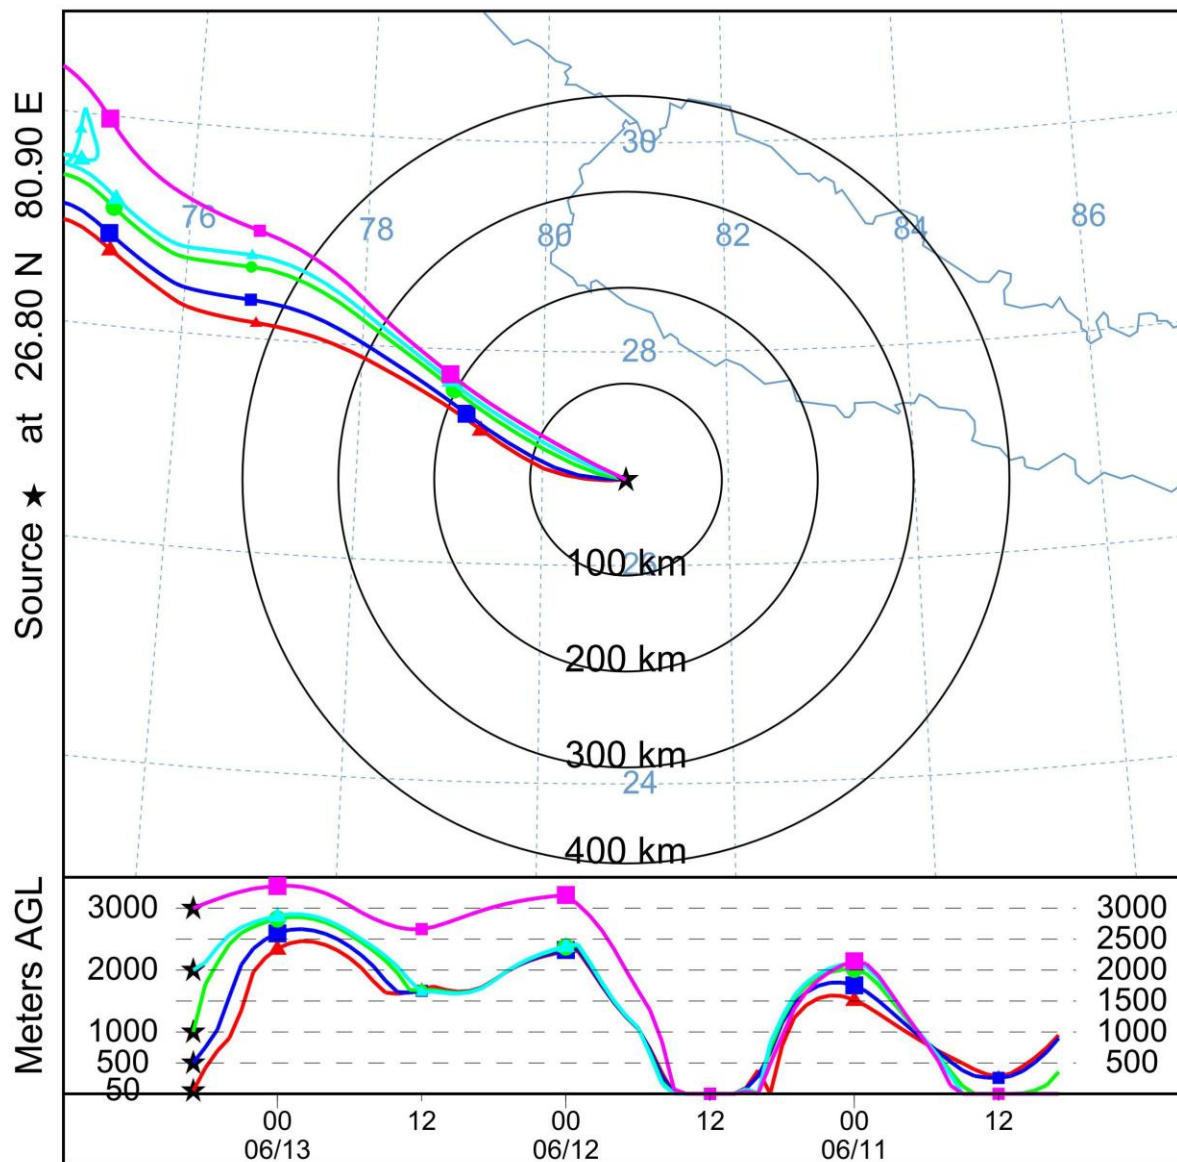

Figure S6: 72 hour back trajectory of air mass arriving at LCK on 13<sup>th</sup> June at altitudes 50 m, 500 m, 1 km, 2 km and 3 km.

NOAA HYSPLIT MODEL  
Backward trajectories ending at 0700 UTC 07 Jul 16  
CDC1 Meteorological Data

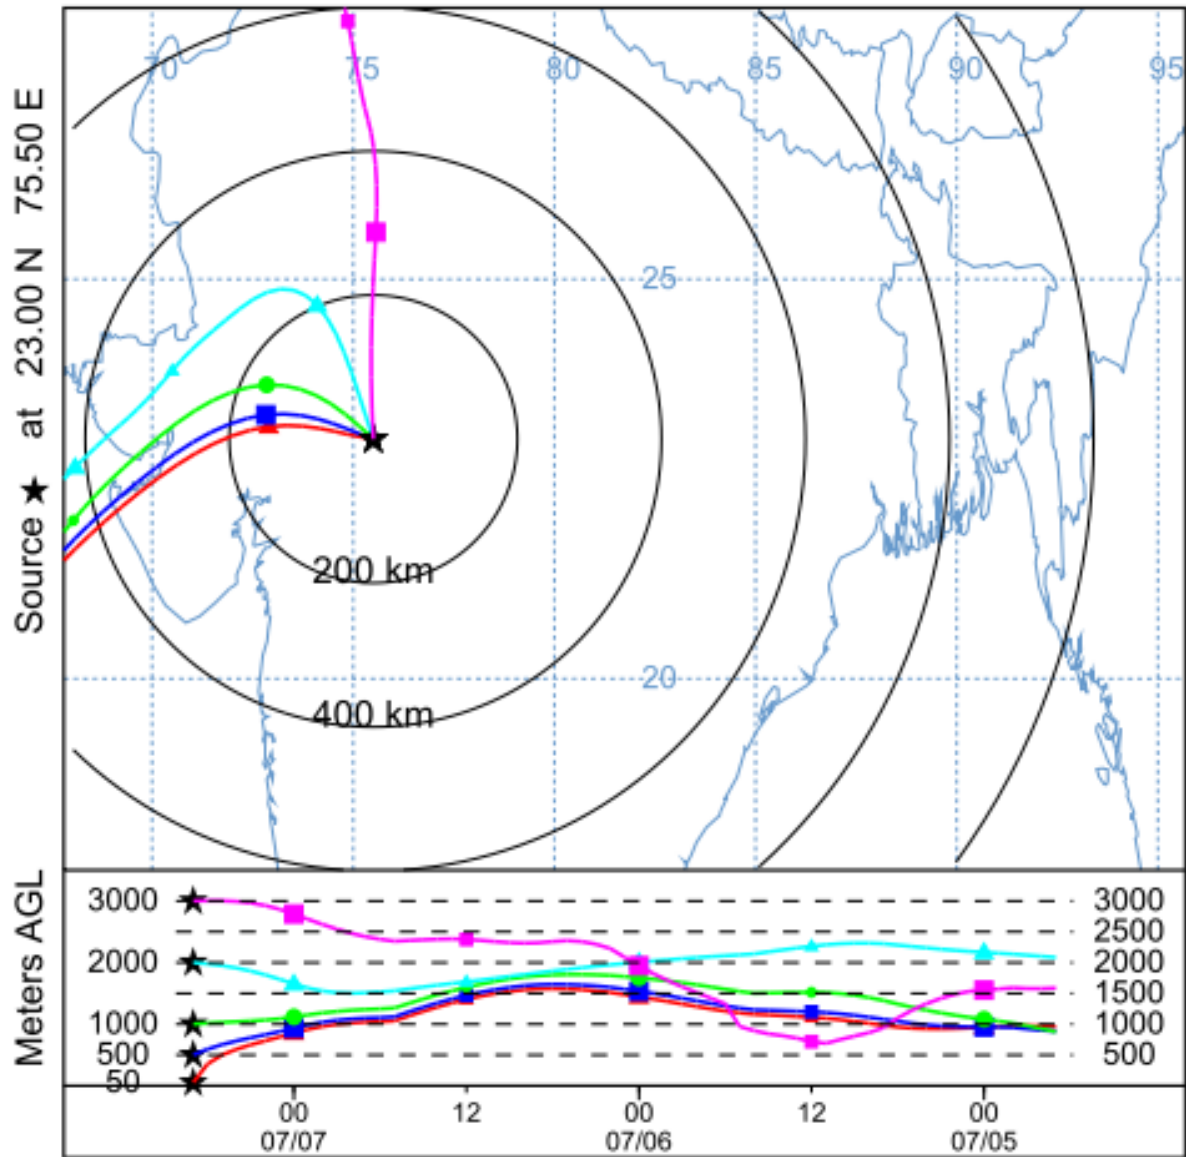

Figure S7: 72 hour back trajectory of air mass arriving at AMD on 7<sup>th</sup> July at altitudes 50 m, 500 m, 1 km, 2 km and 3 km.
